# Supplementary material for: Donor-Derived Cell-Free DNA for Kidney Allograft Surveillance after Conversion to Belatacept: Prospective Pilot Study
Source: MDPI journal article supplement (doi:10.3390/jcm12062437), 2023-03-22
Supplement: s1 [file s1]

**Table S1.** Raw data underlying the analysis showing absolute donor-derived cell-free DNA (dd-cfDNA) in copies/mL, creatinine in mg/dl, albumin-creatinine ratio (ACR) in mg/g, and daily calcineurin inhibitor (CNI). ABMR – antibody-mediated rejection, IR-Tac – immediate-release tacrolimus, ER-Tac – extended-release tacrolimus, LCP-Tac – extended-release tacrolimus using MeldDose® technology, CyA – cyclosporine.

| PatientID | d0         | m1           | m3         | m6         | Value                   | ABMR |
|-----------|------------|--------------|------------|------------|-------------------------|------|
| 1         | 33         | 36           | 34         | 41         | dd-cfDNA (copies/mL)    | 1    |
| 1         | 0.67%      | 1.34%        | 0.89%      | 1.35%      | ddcfDNA (%)             | 1    |
| 1         | 4997       | 2704         | 3887       | 3014       | total cfDNA (copies/mL) | 1    |
| 1         | 2.39       | 2.45         | 2.09       | 2.43       | creatinine (mg/dl)      | 1    |
| 1         | 650        | 1316         | 1847       | 800        | ACR (mg/g)              | 1    |
| 1         | 8 (IR-Tac) | 2 (IR-Tac)   | 0          | 0          | Daily CNI dose (mg)     | 1    |
| 2         | 81         | 76           | 93         | 58         | dd-cfDNA (copies/mL)    | 1    |
| 2         | 0.27%      | 0.37%        | 0.43%      | 1.43%      | ddcfDNA (%)             | 1    |
| 2         | 30029      | 20652        | 21611      | 4063       | total cfDNA (copies/mL) | 1    |
| 2         | 4.65       | 4.04         | 4.07       | 5.89       | creatinine (mg/dl)      | 1    |
| 2         | 3668       | 2822         | 4467       | 2646       | ACR (mg/g)              | 1    |
| 2         | 6 (IR-Tac) | 1.5 (IR-Tac) | 0          | 0          | Daily CNI dose (mg)     | 1    |
| 3         | 42         |              | 168        | 33         | dd-cfDNA (copies/mL)    | 1    |
| 3         | 1.10%      |              | 0.98%      | 0.76%      | ddcfDNA (%)             | 1    |
| 3         | 3558       |              | 17141      | 4350       | total cfDNA (copies/mL) | 1    |
| 3         | 2.9        | 3.7          | 3.24       | 3.37       | creatinine (mg/dl)      | 1    |
| 3         | 1235       | 1559         | 181        | 626        | ACR (mg/g)              | 1    |
| 3         | 3 (IR-Tac) | 0            | 1 (ER-Tac) | 1 (ER-Tac) | Daily CNI dose (mg)     | 1    |
| 4         | 38         | 175          | 130        | 59         | dd-cfDNA (copies/mL)    | 1    |
| 4         | 0.19%      | 0.45%        | 0.51%      | 0.48%      | ddcfDNA (%)             | 1    |
| 4         | 19772      | 38583        | 25686      | 12337      | total cfDNA (copies/mL) | 1    |
| 4         | 3.8        | 2.8          | 2.65       | 2.38       | creatinine (mg/dl)      | 1    |
| 4         | 386        | 1100         | 1112       | 383        | ACR (mg/g)              | 1    |

|   |             |            |       |       |                         |   |
|---|-------------|------------|-------|-------|-------------------------|---|
| 4 | 8 (IR-Tac)  | 0          | 0     | 0     | Daily CNI dose (mg)     | 1 |
| 5 | 5           | 19         | 22    | 16    | dd-cfDNA (copies/mL)    | 0 |
| 5 | 0.17%       | 0.32%      | 0.42% | 0.35% | ddcfDNA (%)             | 0 |
| 5 | 3246        | 6058       | 5128  | 4699  | total cfDNA (copies/mL) | 0 |
| 5 | 1.92        | 2.01       | 1.97  | 1.67  | creatinine (mg/dl)      | 0 |
| 5 | 3           | 4          | 14    | 15    | ACR (mg/g)              | 0 |
| 5 | 200 (CyA)   | 100 (CyA)  | 0     | 0     | Daily CNI dose (mg)     | 0 |
| 6 | 12          | 13         | 8     | 7     | dd-cfDNA (copies/mL)    | 0 |
| 6 | 0.30%       | 0.46%      | 0.23% | 0.10% | ddcfDNA (%)             | 0 |
| 6 | 3927        | 2787       | 3419  | 11886 | total cfDNA (copies/mL) | 0 |
| 6 | 2.9         | 2.6        | 2.52  | 3.16  | creatinine (mg/dl)      | 0 |
| 6 | 48          | 100        | 110   | 193   | ACR (mg/g)              | 0 |
| 6 | 3 (IR-Tac)  | 3 (IR-Tac) | 0     | 0     | Daily CNI dose (mg)     | 0 |
| 7 | 49          | 30         | 36    | 43    | dd-cfDNA (copies/mL)    | 1 |
| 7 | 1.18%       | 1.90%      | 1.05% | 1.15% | ddcfDNA (%)             | 1 |
| 7 | 4113        | 1559       | 3594  | 3773  | total cfDNA (copies/mL) | 1 |
| 7 | 1.84        | 1.81       | 2.14  | 2.08  | creatinine (mg/dl)      | 1 |
| 7 | 787         | 563        | 657   | 708   | ACR (mg/g)              | 1 |
| 7 | 250 (CyA)   | 60 (CyA)   | 0     | 0     | Daily CNI dose (mg)     | 1 |
| 8 | 49          | 31         | 166   | 156   | dd-cfDNA (copies/mL)    | 0 |
| 8 | 0.46%       | 0.27%      | 1.79% | 0.50% | ddcfDNA (%)             | 0 |
| 8 | 10588       | 11363      | 9278  | 31424 | total cfDNA (copies/mL) | 0 |
| 8 | 4.72        | 4.7        | 3.85  | 3.62  | creatinine (mg/dl)      | 0 |
| 8 | 9           | 19         | 40    | 21    | ACR (mg/g)              | 0 |
| 8 | 7 (LCP-Tac) | 0          | 0     | 0     | Daily CNI dose (mg)     | 0 |
| 9 | 10          | 14         | 11    | 53    | dd-cfDNA (copies/mL)    | 0 |
| 9 | 0.32%       | 0.42%      | 0.35% | 2.36% | ddcfDNA (%)             | 0 |
| 9 | 3024        | 3260       | 3148  | 2241  | total cfDNA (copies/mL) | 0 |
| 9 | 1.88        | 1.37       | 1.49  | 1.33  | creatinine (mg/dl)      | 0 |

|    |               |             |             |             |                         |   |
|----|---------------|-------------|-------------|-------------|-------------------------|---|
| 9  | 10            | 15          | 9.2         | 16          | ACR (mg/g)              | 0 |
| 9  | 7 (ER-Tac)    | 2 (ER-Tac)  | 0           | 0           | Daily CNI dose (mg)     | 0 |
| 10 | 6             | 7           | 7           | 7           | dd-cfDNA (copies/mL)    | 0 |
| 10 | 0.29%         | 0.10%       | 0.10%       | 0.25%       | ddcfDNA (%)             | 0 |
| 10 | 2207          | 3434        | 4798        | 2988        | total cfDNA (copies/mL) | 0 |
| 10 | 1.99          | 1.65        | 2.28        | 1.97        | creatinine (mg/dl)      | 0 |
| 10 | 24            | 34          | 6           | 3           | ACR (mg/g)              | 0 |
| 10 | 2 (IR-Tac)    | 1 (IR-Tac)  | 0           | 0           | Daily CNI dose (mg)     | 0 |
| 11 | 226           |             |             | 73          | dd-cfDNA (copies/mL)    | 1 |
| 11 | 0.15%         |             |             | 0.46%       | ddcfDNA (%)             | 1 |
| 11 | 148259        |             |             | 16090       | total cfDNA (copies/mL) | 1 |
| 11 | 5.35          | 5.47        |             | 9.34        | creatinine (mg/dl)      | 1 |
| 11 | 173           | 142         |             | 287         | ACR (mg/g)              | 1 |
| 11 | 8 (LCP-Tac)   | 4 (LCP-Tac) | 2 (LCP-Tac) | 2 (LCP-Tac) | Daily CNI dose (mg)     | 1 |
| 12 | 4             |             | 4           | 2           | dd-cfDNA (copies/mL)    | 0 |
| 12 | 0.16%         |             | 0.23%       | 0.35%       | ddcfDNA (%)             | 0 |
| 12 | 2220          |             | 1917        | 587         | total cfDNA (copies/mL) | 0 |
| 12 | 1.84          | 1.94        | 1.75        | 1.88        | creatinine (mg/dl)      | 0 |
| 12 | 87            | 54          | 125         | 111         | ACR (mg/g)              | 0 |
| 12 | 6 (ER-Tac)    | 3 (ER-Tac)  | 0           | 0           | Daily CNI dose (mg)     | 0 |
| 13 | 16            | 51          | 96          | 20          | dd-cfDNA (copies/mL)    | 0 |
| 13 | 0.23%         | 0.52%       | 0.34%       | 0.39%       | ddcfDNA (%)             | 0 |
| 13 | 7050          | 9882        | 28137       | 5083        | total cfDNA (copies/mL) | 0 |
| 13 | 3.59          | 3.02        | 2.67        | 3.1         | creatinine (mg/dl)      | 0 |
| 13 | 56            | 125         | 290         | 219         | ACR (mg/g)              | 0 |
| 13 | 1.5 (LCP-Tac) | 1 (LCP-Tac) | 0           | 0           | Daily CNI dose (mg)     | 0 |
| 14 | 13            | 18          | 16          | 14          | dd-cfDNA (copies/mL)    | 0 |
| 14 | 0.70%         | 0.90%       | 0.60%       | 0.90%       | ddcfDNA (%)             | 0 |
| 14 | 1941          | 2015        | 2503        | 1535        | total cfDNA (copies/mL) | 0 |

|    |              |            |       |            |                         |   |
|----|--------------|------------|-------|------------|-------------------------|---|
| 14 | 2.46         | 2.27       | 2.43  | 2.15       | creatinine (mg/dl)      | 0 |
| 14 | 14           | 18         | 17    | 15         | ACR (mg/g)              | 0 |
| 14 | 2.5 (ER-Tac) | 0          | 0     | 0          | Daily CNI dose (mg)     | 0 |
| 15 | 6            | 5          | 6     | 4          | dd-cfDNA (copies/mL)    | 0 |
| 15 | 0.27%        | 0.37%      | 0.32% | 0.34%      | ddcfDNA (%)             | 0 |
| 15 | 2326         | 1414       | 1968  | 1239       | total cfDNA (copies/mL) | 0 |
| 15 | 3.07         | 2.77       | 2.69  | 2.37       | creatinine (mg/dl)      | 0 |
| 15 | 287          | 269        | 284   | 242        | ACR (mg/g)              | 0 |
| 15 | 300 (CyA)    | 140 (CyA)  | 0     | 0          | Daily CNI dose (mg)     | 0 |
| 16 | 9            | 20         | 13    | 11         | dd-cfDNA (copies/mL)    | 0 |
| 16 | 0.25%        | 0.39%      | 0.43% | 0.26%      | ddcfDNA (%)             | 0 |
| 16 | 3746         | 5130       | 3151  | 4438       | total cfDNA (copies/mL) | 0 |
| 16 | 3.71         | 3.96       | 4.6   | 4.51       | creatinine (mg/dl)      | 0 |
| 16 | 977          | 547        | 165   | 474        | ACR (mg/g)              | 0 |
| 16 | 125 (CyA)    | 55 (CyA)   | 0     | 0          | Daily CNI dose (mg)     | 0 |
| 17 | 9            | 5          |       | 8          | dd-cfDNA (copies/mL)    | 0 |
| 17 | 0.27%        | 0.18%      |       | 0.17%      | ddcfDNA (%)             | 0 |
| 17 | 3161         | 2934       |       | 4398       | total cfDNA (copies/mL) | 0 |
| 17 | 3            | 3.29       | 3.09  | 2.94       | creatinine (mg/dl)      | 0 |
| 17 | 390          | 410        | 338   | 296        | ACR (mg/g)              | 0 |
| 17 | 5 (ER-Tac)   | 1 (ER-Tac) | 0     | 0          | Daily CNI dose (mg)     | 0 |
| 18 | 11           | 18         | 20    | 6          | dd-cfDNA (copies/mL)    | 0 |
| 18 | 0.32%        | 0.25%      | 0.33% | 0.24%      | ddcfDNA (%)             | 0 |
| 18 | 3275         | 7001       | 5989  | 2696       | total cfDNA (copies/mL) | 0 |
| 18 | 2.36         | 2.71       | 2.6   | 2.84       | creatinine (mg/dl)      | 0 |
| 18 | 976          | 817        | 1202  | 870        | ACR (mg/g)              | 0 |
| 18 | 2 (IR-Tac)   | 1 (IR-Tac) | 0     | 1 (IR-Tac) | Daily CNI dose (mg)     | 0 |
| 19 | 41           | 29         | 25    | 38         | dd-cfDNA (copies/mL)    | 1 |
| 19 | 1.60%        | 1.10%      | 1.20% | 1.10%      | ddcfDNA (%)             | 1 |

|    |              |              |       |       |                         |   |
|----|--------------|--------------|-------|-------|-------------------------|---|
| 19 | 2562         | 2745         | 2113  | 3572  | total cfDNA (copies/mL) | 1 |
| 19 | 2.1          | 2.08         | 1.91  | 2.16  | creatinine (mg/dl)      | 1 |
| 19 | 202          | 293          | 267   | 145   | ACR (mg/g)              | 1 |
| 19 | 3 (ER-Tac)   | 1.5 (ER-Tac) | 0     | 0     | Daily CNI dose (mg)     | 1 |
| 20 | 8            | 7            | 7     | 6     | dd-cfDNA (copies/mL)    | 0 |
| 20 | 0.21%        | 0.10%        | 0.18% | 0.18% | ddcfDNA (%)             | 0 |
| 20 | 3742         | 2823         | 4116  | 3507  | total cfDNA (copies/mL) | 0 |
| 20 | 1.43         | 1.66         | 1.5   | 1.29  | creatinine (mg/dl)      | 0 |
| 20 | 870          | 752          | 1360  | 898   | ACR (mg/g)              | 0 |
| 20 | 0            | 0            | 0     | 0     | Daily CNI dose (mg)     | 0 |
| 21 |              |              | 22    | 6     | dd-cfDNA (copies/mL)    | 0 |
| 21 |              |              | 0.85% | 0.16% | ddcfDNA (%)             | 0 |
| 21 |              |              | 2546  | 3578  | total cfDNA (copies/mL) | 0 |
| 21 | 1.73         | 1.84         | 2.78  | 1.78  | creatinine (mg/dl)      | 0 |
| 21 | 10           | 22           | 140   | 34    | ACR (mg/g)              | 0 |
| 21 | 3 (ER-Tac)   | 1 (ER-Tac)   | 0     | 0     | Daily CNI dose (mg)     | 0 |
| 22 | 98           |              | 232   | 234   | dd-cfDNA (copies/mL)    | 1 |
| 22 | 0.57%        |              | 3.42% | 0.44% | ddcfDNA (%)             | 1 |
| 22 | 17073        |              | 6770  | 52866 | total cfDNA (copies/mL) | 1 |
| 22 | 3.13         | 2.78         | 2.3   | 1.95  | creatinine (mg/dl)      | 1 |
| 22 | 6            | 8            | 23    | 46    | ACR (mg/g)              | 1 |
| 22 | 18 (LCP-Tac) | 4 (LCP-Tac)  | 0     | 0     | Daily CNI dose (mg)     | 1 |

**Table S2.** Demographics and baseline characteristic of 22 kidney transplant recipients, who underwent switch to belatacept due to clinical indication.\*

| Patient No. | Recipient Age years /sex | Reported cause of KFRT | Dialysis modality / years on dialysis | Donor Age years/sex | Living vs Deceased Donor / ABO compatibility | Cold ischemia time (minutes) | Induction therapy | Baseline Immuno-suppression / daily dose | Time after KTx (years) | ABMR / ah grade in latest biopsy      | CAD / DM / Smoking status | Donor cause of death / comorbid conditions |
|-------------|--------------------------|------------------------|---------------------------------------|---------------------|----------------------------------------------|------------------------------|-------------------|------------------------------------------|------------------------|---------------------------------------|---------------------------|--------------------------------------------|
| 1           | 34 / male                | IgAN                   | PD / 2                                | 33 / female         | Living / ABO compatible                      | -                            | Basiliximab       | IR-Tac + MPA + Steroid                   | 5                      | caABMR / ah3                          | no / no / active (5 py)   | None / Hypercholesterinemia                |
| 2           | 32 / female              | HUS                    | n/a                                   | 43 / female         | Living / ABO compatible                      | -                            | Basiliximab       | IR-Tac + MPA + Steroid                   | 11                     | caABMR / ah3                          | no / no / never           | None / none                                |
| 3           | 53 / male                | unknown                | HD / 0                                | 50 / female         | Living / ABO compatible                      | -                            | Basiliximab       | IR-Tac + MPA                             | 7                      | caABMR / ah3                          | No / no / active (35 py)  | None                                       |
| 4           | 32 / male                | IgAN                   | HD / 1                                | 47 / male           | Living / ABO compatible                      | -                            | Basiliximab       | IR-Tac + MPA + Steroid                   | 8                      | TMA from CNI toxicity or caABMR / ah3 | no / no / never           | None / none                                |

|   |                |         |         |                |                              |     |                           |                                       |     |                                                |                                 |                                                                  |
|---|----------------|---------|---------|----------------|------------------------------|-----|---------------------------|---------------------------------------|-----|------------------------------------------------|---------------------------------|------------------------------------------------------------------|
| 5 | 53 / male      | Alport  | PD / 1  | 45 / male      | Deceased                     | 674 | Basiliximab               | CyA<br>+ MPA                          | 13  | ah2                                            | No / yes<br>/ former<br>(20 py) | Head trauma / none                                               |
| 6 | 69 / male      | ADPKD   | HD / 1  | 61 /<br>female | Living / ABO<br>incompatible | -   | Rituximab,<br>Basiliximab | IR-Tac<br>+ MPA<br>+ Steroid          | 7   | ATN from<br>CNI<br>toxicity /<br>ah3           | no / no /<br>never              | None / HTN                                                       |
| 7 | 53 / male      | IgAN    | PD / 1  | 56 /<br>female | Living / ABO<br>compatible   | -   | Basiliximab               | CyA<br>+ MPA<br>+ low-dose<br>Steroid | 16  | caABMR /<br>ah3                                | no / no /<br>never              | None / Recurrent<br>urinary tract infections                     |
| 8 | 57 / male      | DM      | HD / 8  | 64 / male      | Deceased                     | 543 | Basiliximab               | LCP-Tac<br>+ MPA<br>+ Steroid         | < 1 | no biopsy<br>–<br>suspected<br>CNI<br>toxicity | yes / yes<br>/ never            | Intracerebral<br>hemorrhage / HTN,<br>severe<br>arteriosclerosis |
| 9 | 53 /<br>female | unknown | HD / 11 | 55 /<br>female | Deceased<br>Donor            | 520 | Basiliximab               | ER-Tac<br>+ MPA<br>+ Steroid          | 4   | ATN from<br>acute CNI<br>toxicity /<br>ah0     | No / no /<br>never              | Subarachnoidal<br>hemorrhage /<br>HCV infection                  |

|    |             |                            |        |             |                           |     |                        |                                       |    |                                   |                           |                                                              |
|----|-------------|----------------------------|--------|-------------|---------------------------|-----|------------------------|---------------------------------------|----|-----------------------------------|---------------------------|--------------------------------------------------------------|
| 10 | 62 / female | ADPKD                      | HD / 3 | 52 / male   | Living / AB0 incompatible | -   | Basiliximab            | IR-Tac<br>+ MPA<br>+ low-dose Steroid | 10 | ah3                               | No / yes / former (50 py) | APC resistance                                               |
| 11 | 30 / female | SLE                        | HD / 1 | 52 / male   | Living / AB0 incompatible | -   | Rituximab, Basiliximab | LCP-Tac<br>+ MPA<br>+ Steroid         | 2  | caABMR / ah3                      | no / no / never           | None                                                         |
| 12 | 32 / female | Sjögren's syndrome with IN | n/a    | 61 / female | Living / AB0 compatible   | -   | Basiliximab            | LCP-Tac                               | 9  | ah3                               | no / no / never           | None                                                         |
| 13 | 72 / male   | HTN                        | HD / 5 | 66 / male   | Deceased Donor            | 710 | Basiliximab            | LCP-Tac<br>+ Steroid                  | 2  | ATN from acute CNI toxicity / ah1 | Yes / yes / never         | Intracerebral ischemia / HTN, multiple sclerosis, adipositas |
| 14 | 76 / male   | Membranous GN              | HD / 1 | 55 / female | Living / AB0 incompatible | -   | Basiliximab            | ER-Tac<br>+ MPA<br>+ low-dose Steroid | 10 | ah3                               | Yes / yes / never         | None                                                         |
| 15 | 59 / female | IgAN                       | n/a    | 63 / male   | Living                    | -   | unknown                | CyA<br>+ MPA                          | 18 | No biopsy – suspected             | No / no / Former (10 py)  | None                                                         |



|    |           |         |        |                |                            |      |             |                                          |    |                                                           |                               |                                          |
|----|-----------|---------|--------|----------------|----------------------------|------|-------------|------------------------------------------|----|-----------------------------------------------------------|-------------------------------|------------------------------------------|
|    |           |         |        |                |                            |      |             |                                          |    | chronic<br>CNI<br>toxicity                                |                               |                                          |
| 16 | 68 / male | IN      | HD / 5 | 57 / male      | Deceased<br>Donor          | 623  | unknown     | CyA<br>+ MPA                             | 23 | No biopsy<br>–<br>suspected<br>chronic<br>CNI<br>toxicity | No / yes<br>/ never           | Head trauma / None                       |
| 17 | 57 / male | unknown | HD / 9 | 51 / male      | Deceased<br>Donor          | 1422 | unknown     | ER-Tac<br>+ MPA<br>+ low-dose<br>Steroid | 22 | No biopsy<br>–<br>suspected<br>chronic<br>CNI<br>toxicity | No / no /<br>never            | Intracerebral<br>hemorrhage /<br>unknown |
| 18 | 41 / male | IgAN    | PD / 1 | 70 / male      | Living / AB0<br>compatible | -    | unknown     | IR-Tac<br>+ MPA<br>+ Steroid             | 10 | ah3                                                       | No / no /<br>never            | Prostate cancer, HTN                     |
| 19 | 44 / male | IgAN    | PD / 1 | 51 /<br>female | Living / AB0<br>compatible | -    | Basiliximab | ER-Tac<br>+ MPA<br>+ Steroid             | 13 | cABMR /<br>ah3                                            | No / no /<br>former<br>(3 py) | None                                     |

|    |           |         |         |                     |                            |     |             |                                 |     |                             |                                    |                                          |
|----|-----------|---------|---------|---------------------|----------------------------|-----|-------------|---------------------------------|-----|-----------------------------|------------------------------------|------------------------------------------|
| 20 | 31 / male | IgAN    | HD / 1  | Unknown<br>/ female | Living / ABO<br>compatible | -   | unknown     | Sirolimus<br>+ MPA<br>+ Steroid | 17  | ah3                         | No / no /<br>never                 | None                                     |
| 21 | 58 / male | ADPKD   | HD / 9  | 50 /<br>female      | Deceased<br>Donor          | 477 | Basiliximab | ER-Tac<br>+ MPA<br>+ Steroid    | 9   | ah3                         | Yes / no<br>/ never                | Intracerebral<br>hemorrhage /<br>unknown |
| 22 | 44 / male | unknown | HD / 15 | 61 /<br>female      | Deceased<br>Donor          | 830 | Basiliximab | LCP-Tac<br>+ MPA<br>+ Steroid   | < 1 | suspected<br>aABMR /<br>ah3 | Yes /<br>yes /<br>former<br>(15py) | Subarachnoid<br>hemorrhage /<br>unknown  |

\* No. - Number, KFRT - kidney failure requiring renal replacement therapy, IgAN - IgA nephropathy, HUS - hemolytic uremic syndrome, ADPKD - autosomal dominant polycystic kidney disease, SLE – systemic lupus erythematosus, IN –interstitial nephritis, PD – peritoneal dialysis, HD – hemodialysis, KTx – kidney transplantation, IS – immunosuppression, IR-Tac – immediate release tacrolimus, ER-Tac – extended release tacrolimus, LCP-Tac – novel extended release tacrolimus, CyA – cyclosporin, MPA – mycophenolic acid, ATN – acute tubular necrosis, ah – arteriolar hyalinosis according to Banff 2017 classification, CNI – calcineurin inhibitor, caABMR – chronic active antibody mediated rejection, CAD – coronary artery disease, DM – diabetes mellitus, py – pack years, HTN – arterial hypertension
